# Supplementary material for: A comparison of serum and plasma specimens in NMR-based metabonomics and its application in chronic atrophic gastritis rats
Source: Royal Society of Chemistry journal article supplement (doi:10.1039/c9ay00156e), 2019-01-01
Supplement: c9ay00156e1.pdf [file c9ay00156e1.pdf]

## Supplementary information

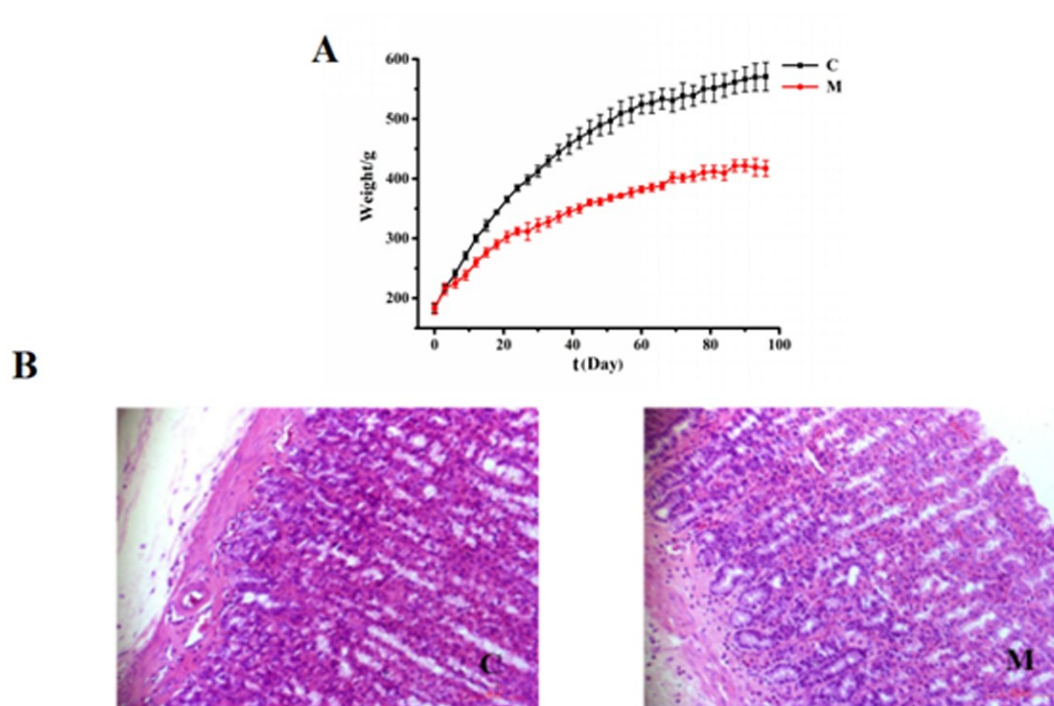

**Fig. S1.** Plot of body weight trend and histological examination of gastric tissues from control group and model group. Values are expressed as mean  $\pm$  SD ( $n = 6$ ). (C) Control group, (M) Model group.
